# Supplementary material for: Evolution of an Eurasian Avian-like Influenza Virus in Naïve and Vaccinated Pigs
Source: PLOS journal article supplement (doi:10.1371/journal.ppat.1002730), 2012-05-31

Pig

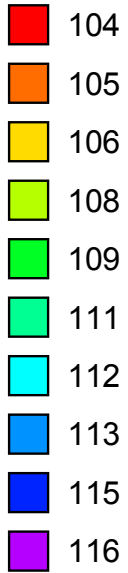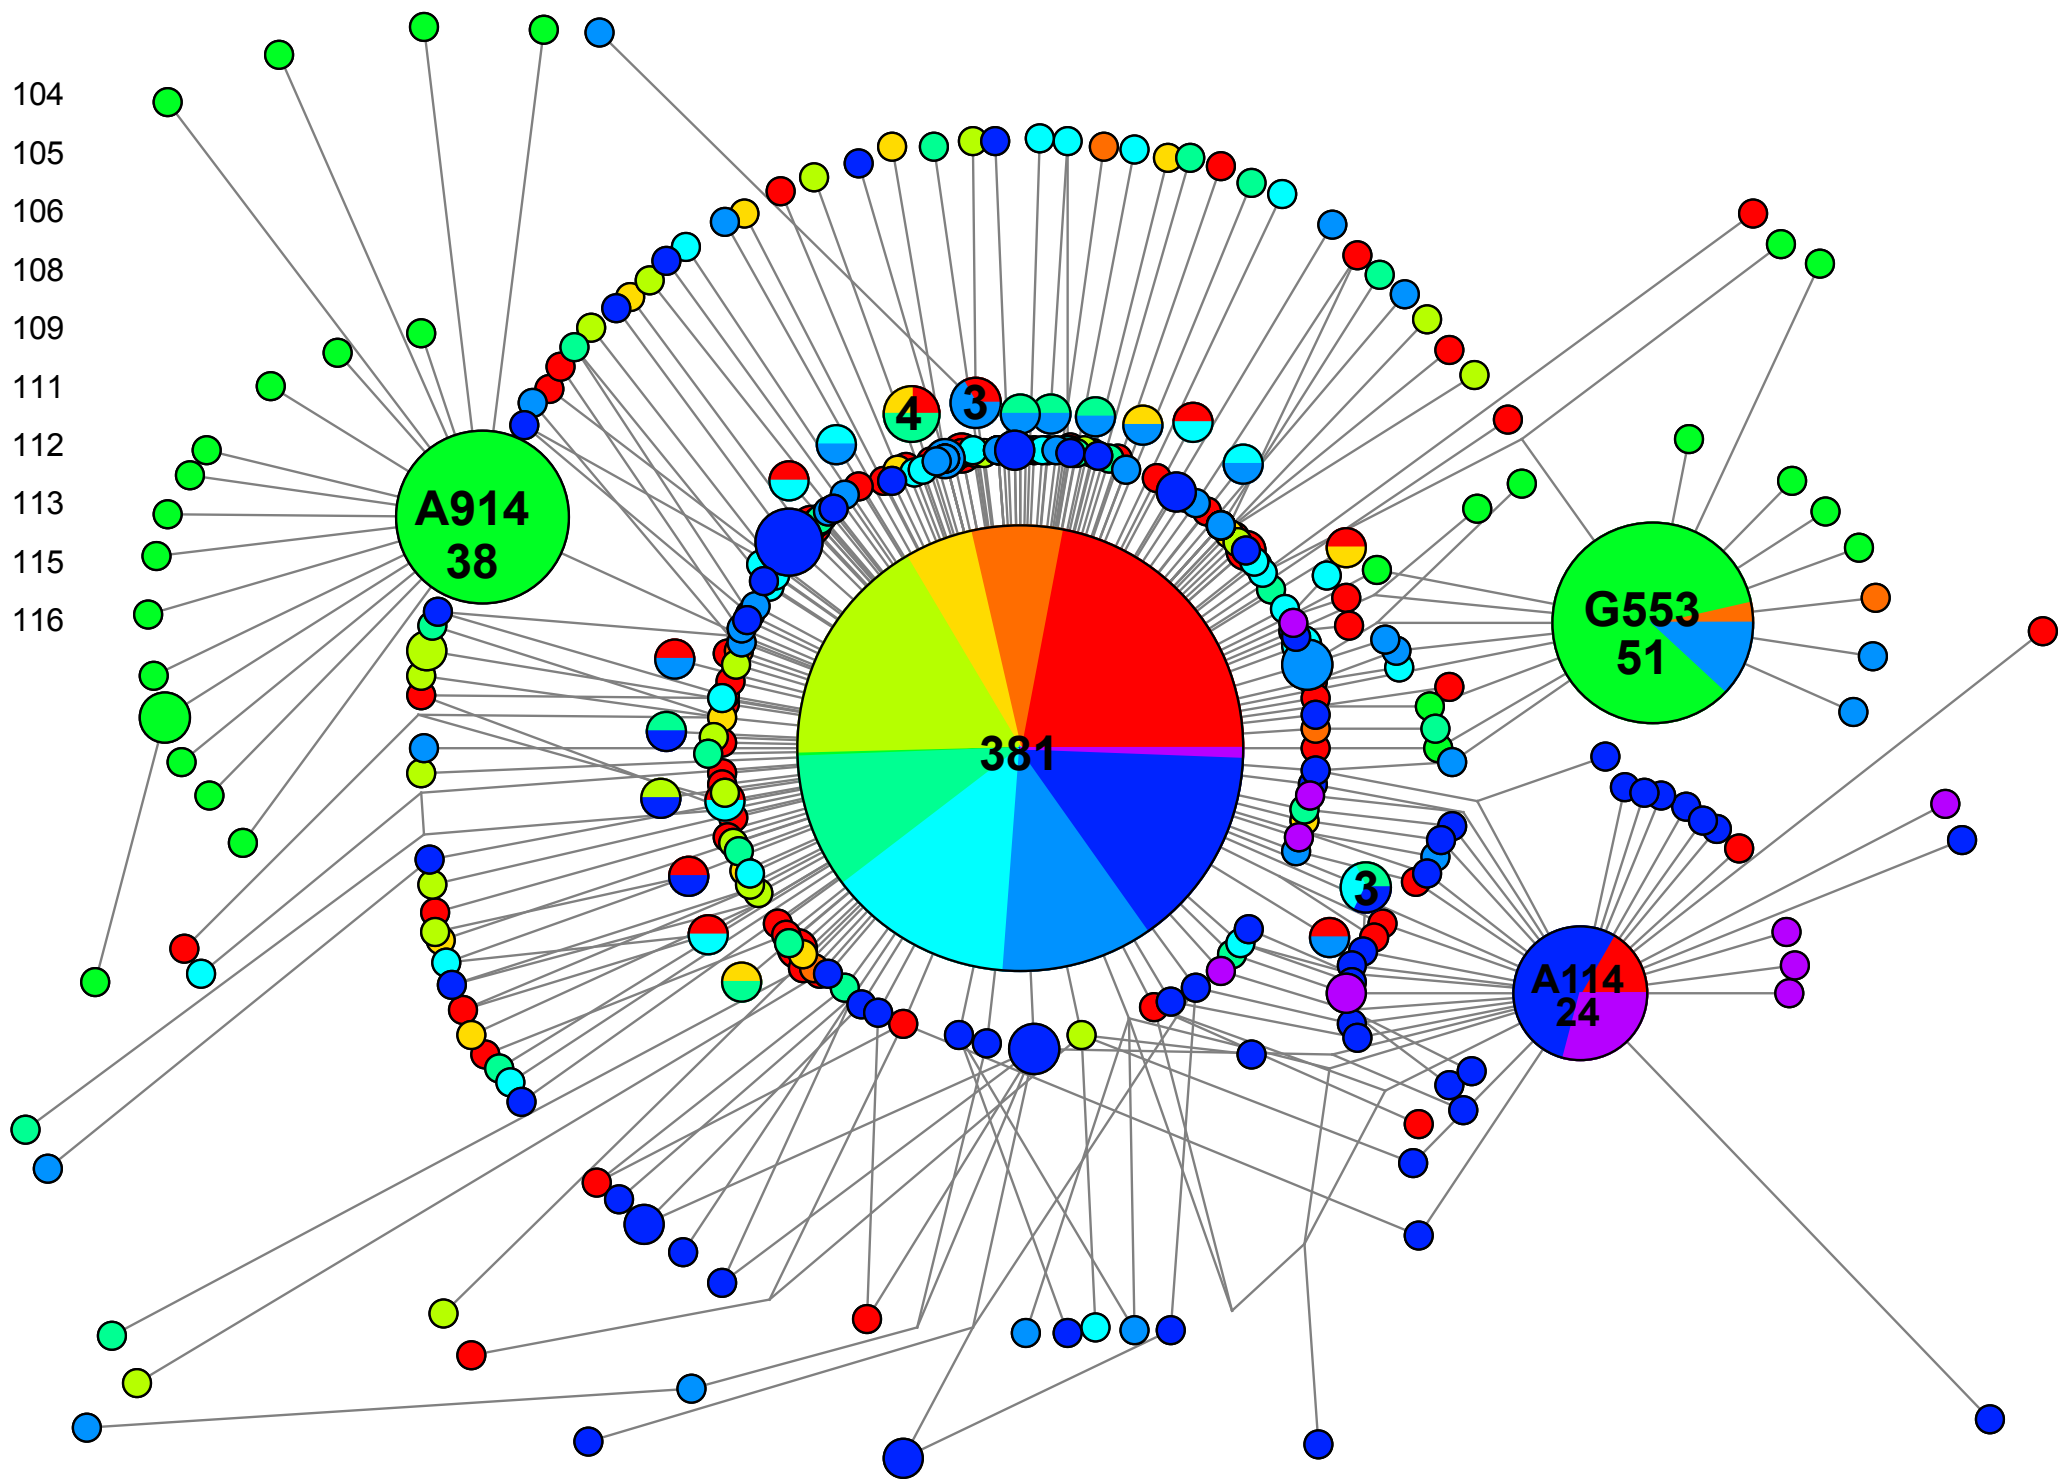

Supplement: S6 (10.1371/journal.ppat.1002730.s006) [file journal.ppat.1002730.s006]
